# Supplementary material for: Carbon quantum dots modified with hyperbranched polyglycerol for bioapplications: improved photostability and temperature selectivity
Source: Royal Society of Chemistry journal article supplement (doi:10.1039/d5nr00331h), 2025-01-01
Supplement: d5nr00331h1.pdf [file d5nr00331h1.pdf]

## Supporting Information

### Carbon quantum dot modified with hyperbranched polyglycerol for bioapplication: Improved photostability and temperature selectivity

Shingo Sotoma,<sup>\*a</sup> Kota Shiraya,<sup>a</sup> Suzune Shimomura,<sup>a</sup> Yumi Yoshida<sup>a</sup> and Kohji Maeda<sup>a</sup>

<sup>a</sup>Faculty of Molecular Chemistry and Engineering, Kyoto Institute of Technology, Matsugasaki,  
Sakyo-ku, Kyoto 606-8585, Japan;

\*Corresponding author. Email: [shsotoma@kit.ac.jp](mailto:shsotoma@kit.ac.jp)

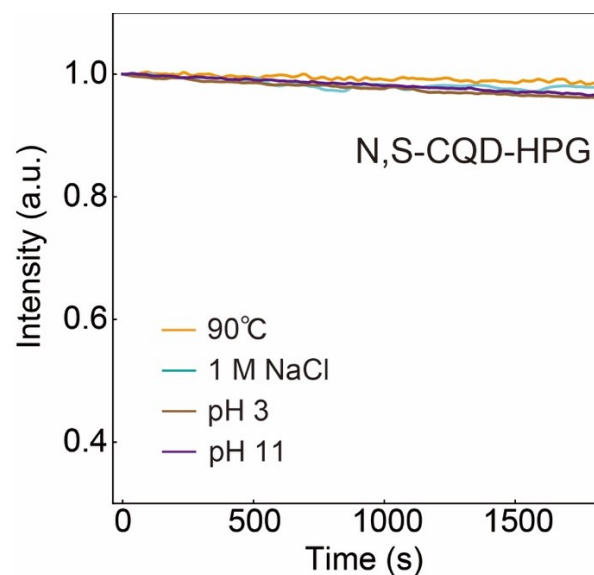

Fig. S1. Relative change in fluorescence intensity of N,S-CQD-HPG under excitation at 350 nm every 10 seconds under conditions of 90°C, 1 M NaCl, pH 3, and pH 11.

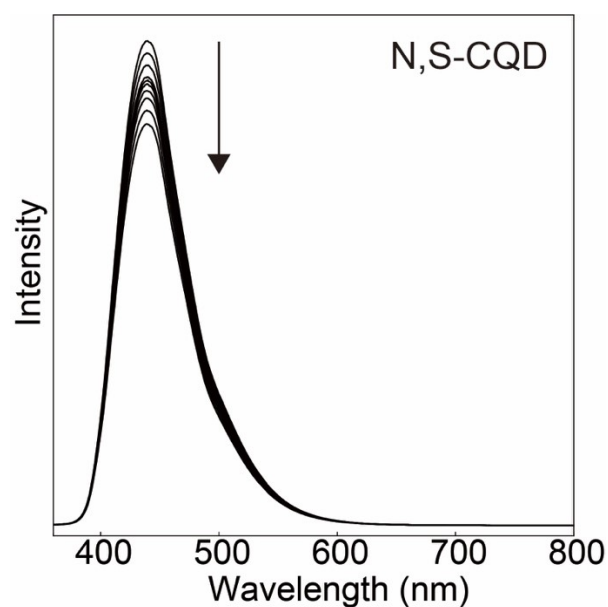

Fig. S2. Fluorescence spectra of N,S-CQD measured consecutively 10 times, showing a decrease in fluorescence intensity with repeated measurements.

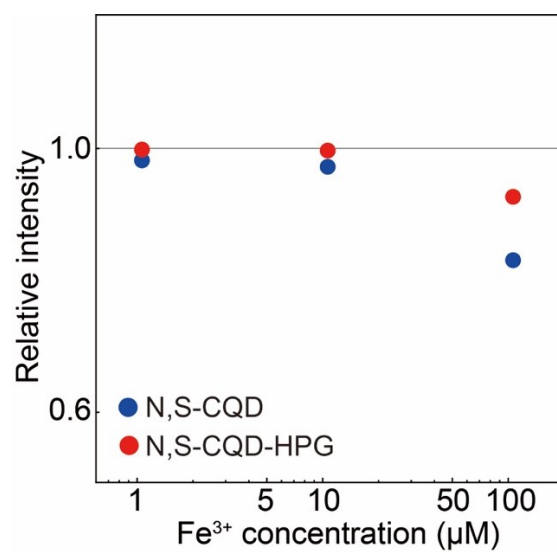

Fig. S3. Normalized fluorescence intensity of N,S-CQD and N,S-CQD-HPG in a solution containing Fe<sup>3+</sup> ions at concentrations ranging from 1 to 100 μM.
